# Supplementary material
Source: PubMed Central journal article supplement (PMC4760353)
Supplement: NIHMS758882-supplement-supporting_data.pdf [file NIHMS758882-supplement-supporting_data.pdf]

# $\alpha,\beta$ -Dehydro-Dopa: a hidden participant in mussel adhesion

Razieh Mirshafian<sup>1</sup>, Wei Wei, Jacob N. Israelachvili<sup>2</sup>, and J. Herbert Waite<sup>1,3</sup>

<sup>1</sup>Marine Science Institute, University of California, Santa Barbara 93106

<sup>2</sup>Chemical Engineering, University of California, Santa Barbara, California 93106

<sup>3</sup>Department of Molecular, Cell & Developmental Biology, University of California, Santa Barbara, California 93106

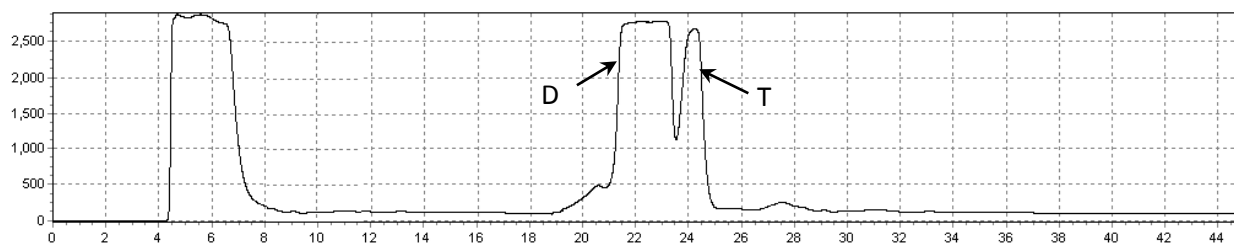

S<sub>1</sub>) HPLC results of purified N-acetyl dopa ethyl ester (**D**)

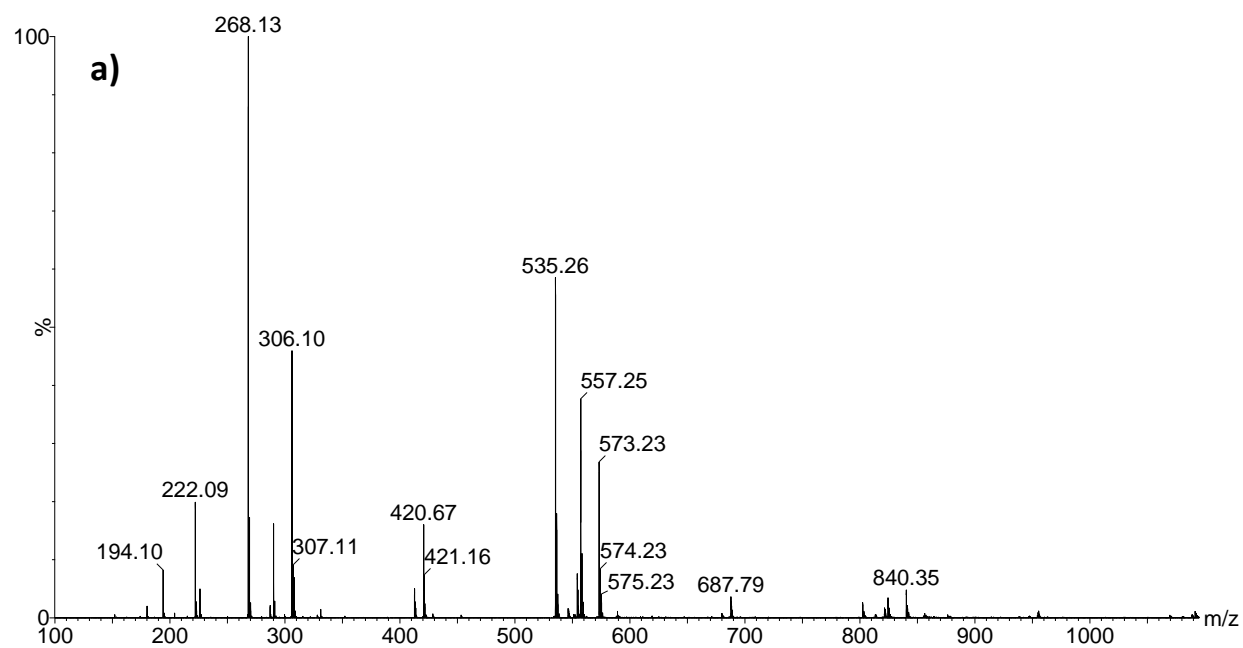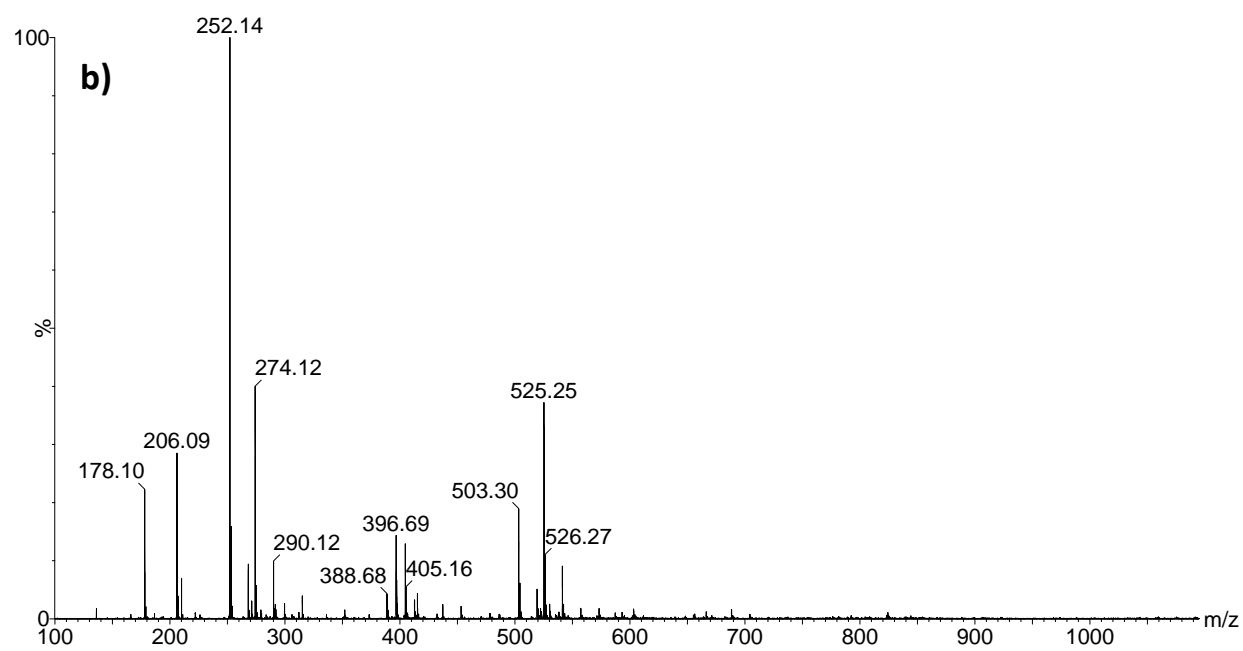

S<sub>2</sub>) Mass spectra of a) **D** b) **T**

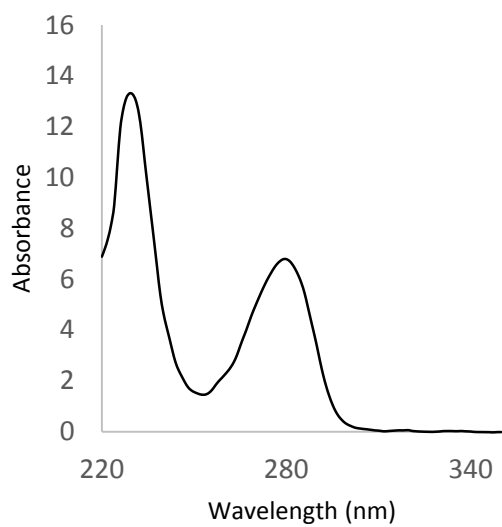

S<sub>3</sub>) The UV-Vis spectrum of synthesized **D**

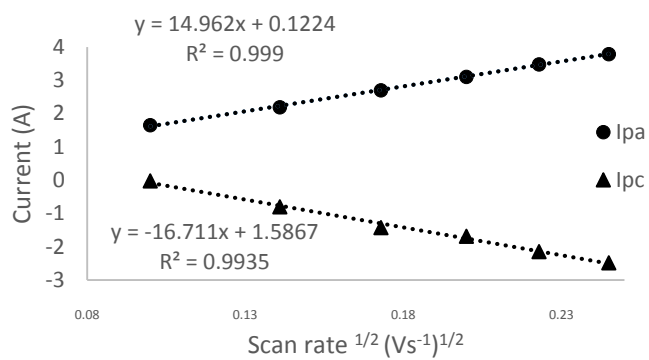

S<sub>4</sub>) plot of current versus square root of scan rate for  $5 \times 10^{-5}$  M **D** in 0.1 M PBS at pH 7 using CPE electrode

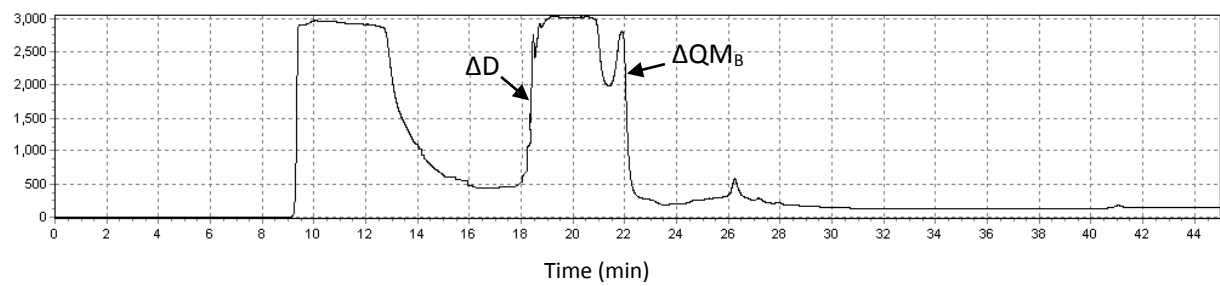

S<sub>5</sub>) HPLC results of purified N-acetyl dehydrodopa ethyl ester ( $\Delta D$ )

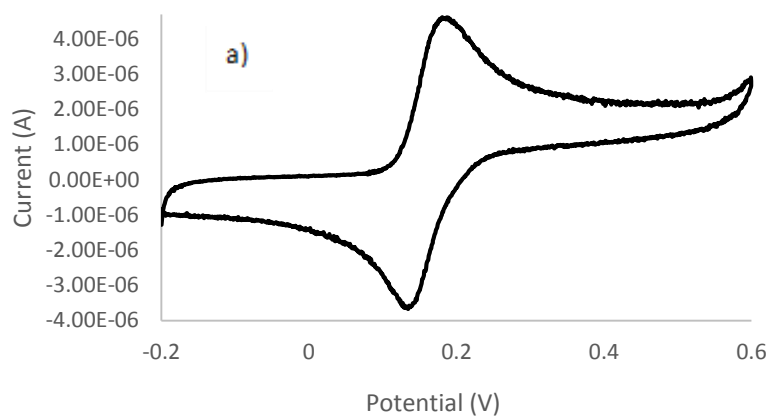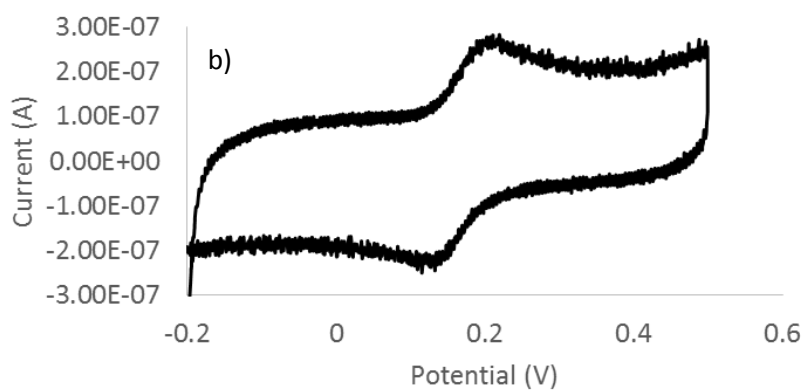

S<sub>6</sub>) CV of a) **AD** b) caffeic acid in 0.1 M PBS at pH 7 using CPE electrode, Scan rate 0.05 Vs<sup>-1</sup>

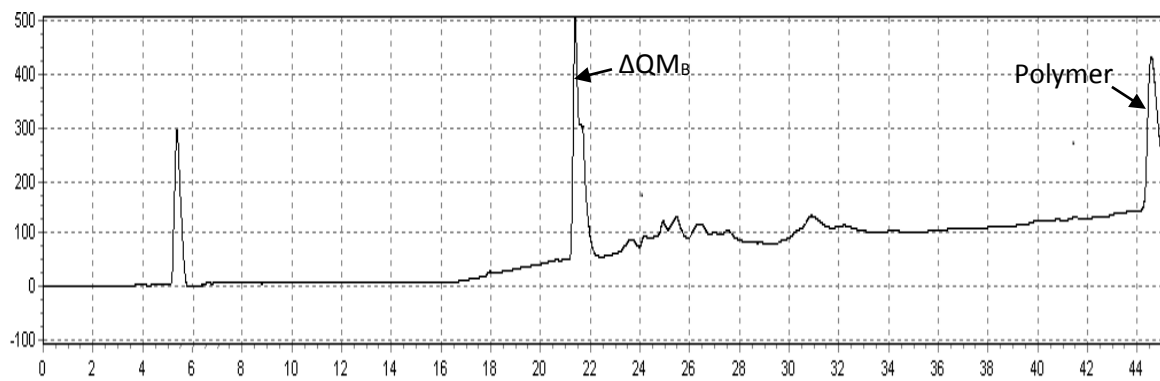

S<sub>7</sub>) HPLC results of purified N-acetyl dehydrodopa quinone methide ethyl ester ( $\Delta QM_B$ ) and the polymer

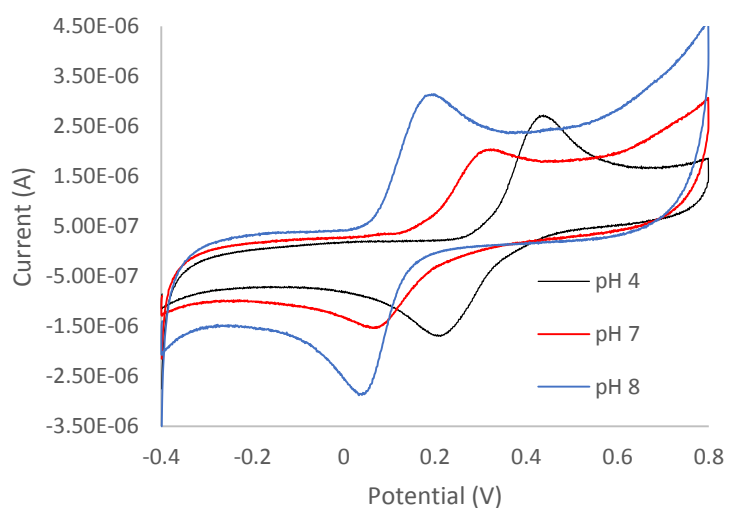

S<sub>8</sub>) CV of CPE electrode in  $5 \times 10^{-5}$  M **D** in 0.1 M at different pH, Scan rate  $0.05 \text{ Vs}^{-1}$

a)

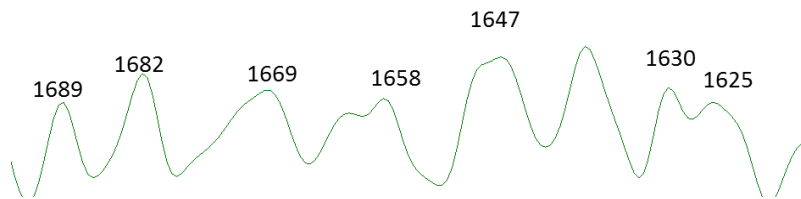

b)

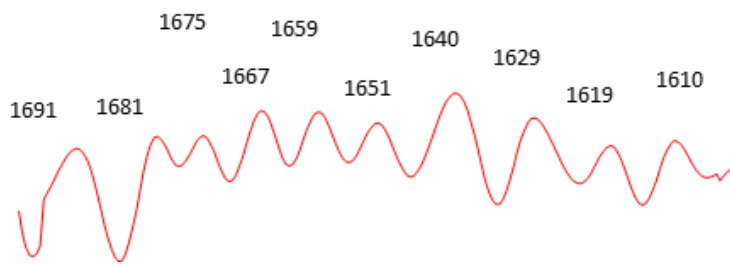

S<sub>9</sub>) FTIR second derivatives of 1 mg/ml Mfp3 slow in deuterated buffer a) at pH 7, b) at pH 4
